# Supplementary material for: Lattice solvent controlled photochromism of tripyridyl-triazine-based zinc bromide complexes
Source: Royal Society of Chemistry journal article supplement (doi:10.1039/d1qi01242h), 2022-01-01
Supplement: d1qi01242h1.pdf [file d1qi01242h1.pdf]

## Supporting Information (SI)

### Lattice solvent controlled photochromism of tripyridyl-triazine-based zinc bromide complexes

Pengfei Hao,\* Xing Liu, Chunyu Guo, Guozheng Zhao, Gaopeng Li, Junju Shen and  
Yunlong Fu\*

*Key Laboratory of Magnetic Molecules, Magnetic Information Materials Ministry of Education,  
School of Chemical and Material Science, Shanxi Normal University, Taiyuan 030006, China*

*E-mail address: haopengfei\_2015@126.com; yunlongfu@sxnu.edu.cn.*

#### Content

|                                                                                                                                                                                                                                                                                                                                                                        |   |
|------------------------------------------------------------------------------------------------------------------------------------------------------------------------------------------------------------------------------------------------------------------------------------------------------------------------------------------------------------------------|---|
| <b>1. Figures</b> .....                                                                                                                                                                                                                                                                                                                                                | 3 |
| <b>Fig. S1</b> The Chem Draw type diagram of the chemical formula of [ZnBr <sub>2</sub> (2-TPT)]. .....                                                                                                                                                                                                                                                                | 3 |
| <b>Fig. S2</b> View of the packing diagram of <b>1</b> . .....                                                                                                                                                                                                                                                                                                         | 3 |
| <b>Fig. S3</b> View of the packing diagram of <b>2</b> . .....                                                                                                                                                                                                                                                                                                         | 3 |
| <b>Fig. S4</b> The scatter graph of <b>1</b> (a) and <b>2</b> (b). .....                                                                                                                                                                                                                                                                                               | 4 |
| <b>Fig. S5</b> Powder X-ray diffraction (PXRD) patterns of <b>1</b> transform into <b>2</b> . .....                                                                                                                                                                                                                                                                    | 4 |
| <b>Fig. S6</b> Powder X-ray diffraction (PXRD) patterns of <b>2</b> transform into <b>1</b> . .....                                                                                                                                                                                                                                                                    | 4 |
| <b>Fig. S7</b> The comparison UV-vis absorption spectra of <b>1</b> and <b>2</b> before and after light irradiation. ....                                                                                                                                                                                                                                              | 5 |
| <b>Fig. S8</b> IR spectra of <b>1</b> , <b>1P</b> , <b>2</b> and <b>2P</b> . .....                                                                                                                                                                                                                                                                                     | 5 |
| <b>Fig. S9</b> Powder X-ray diffraction (PXRD) patterns of <b>1</b> , <b>1P</b> , <b>2</b> and <b>2P</b> at room temperature. ....                                                                                                                                                                                                                                     | 5 |
| <b>Fig. S10</b> The comparison of energy gaps and UV-vis absorption spectra of <b>1</b> and <b>2</b> before irradiation. ....                                                                                                                                                                                                                                          | 6 |
| <b>Fig. S11</b> Calculated band structures of <b>1</b> (a) and <b>2</b> (b). .....                                                                                                                                                                                                                                                                                     | 6 |
| <b>Fig. S12</b> Abs( <i>t</i> ) vs. <i>t</i> plots for <b>1-2</b> . The lines show the fits of the plots according to rate law Abs( <i>t</i> ) = A <sub>0</sub> + A <sub>1</sub> (exp(- <i>k</i> <sub>1</sub> <i>t</i> ) + exp(- <i>k</i> <sub>2</sub> <i>t</i> )) ( <i>inset</i> : coloration rate constant values of <b>1-2</b> ). (λ <sub>max</sub> = 484 nm). .... | 6 |

|                                                                                                                                                   |    |
|---------------------------------------------------------------------------------------------------------------------------------------------------|----|
| <b>Fig. S13</b> View of the monomer diagrams of <b>1</b> (a) and <b>2</b> (b). .....                                                              | 7  |
| <b>Fig. S14</b> Photographs showing the fluorescence of <b>1</b> and <b>2</b> . .....                                                             | 7  |
| <b>2. Tables</b> .....                                                                                                                            | 8  |
| <b>Table S1</b> Crystallographic data and refinement parameters of compounds <b>1</b> and <b>2</b> .....                                          | 8  |
| <b>Table S2</b> Selected bond lengths (Å) and angles (°) of <b>1</b> and <b>2</b> .....                                                           | 9  |
| <b>Table S3</b> Anisotropic displacement parameters $U_{ij}$ (Å <sup>2</sup> ×10 <sup>3</sup> ) for <b>1</b> and <b>2</b> . .....                 | 10 |
| <b>Table S4</b> Hydrogen bonds of compound <b>1</b> and <b>2</b> (Å and °). .....                                                                 | 13 |
| <b>Table S5</b> Selected QTAIM parameters [a.u.] and interaction energies $E$ [kJ·mol <sup>-1</sup> ] for compounds <b>1</b> and <b>2</b> . ..... | 14 |
| <b>Table S6</b> Reflectivity (R%) of the wavelengths (200-500nm) of compounds <b>1</b> and <b>2</b> . .....                                       | 15 |
| <b>Table S7</b> Photochromic kinetic parameters at room temperature of compounds <b>1</b> and <b>2</b> . .....                                    | 25 |

## 1. Figures

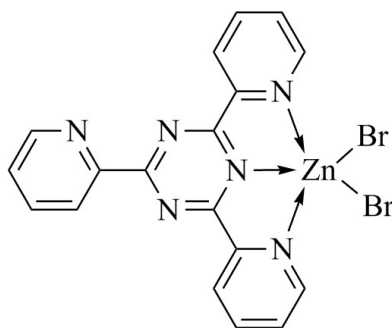

**Fig. S1** The Chem Draw type diagram of the chemical formula of [ZnBr<sub>2</sub>(2-TPT)].

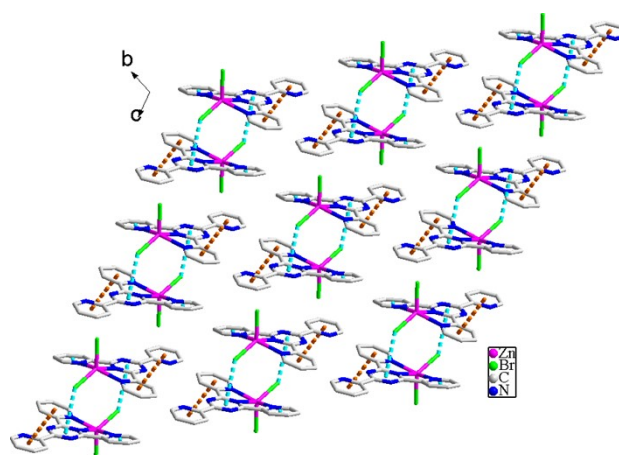

**Fig. S2** View of the packing diagram of 1.

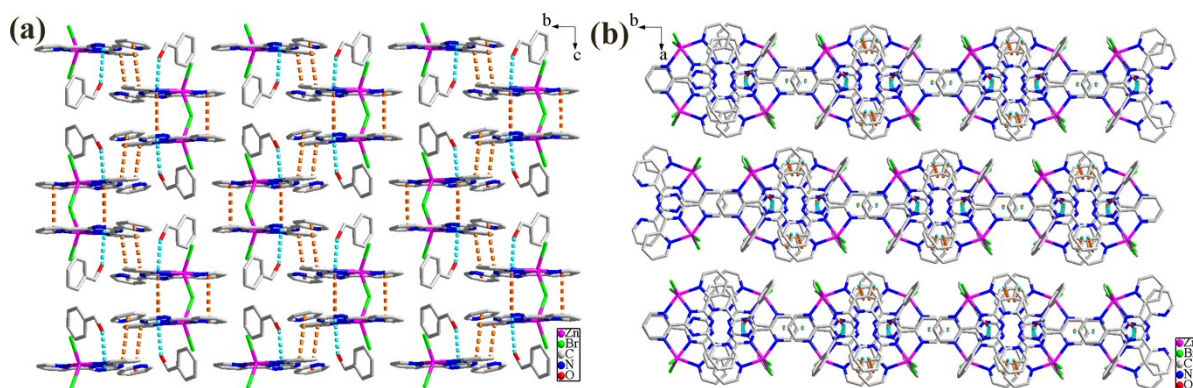

**Fig. S3** View of the packing diagram of 2.

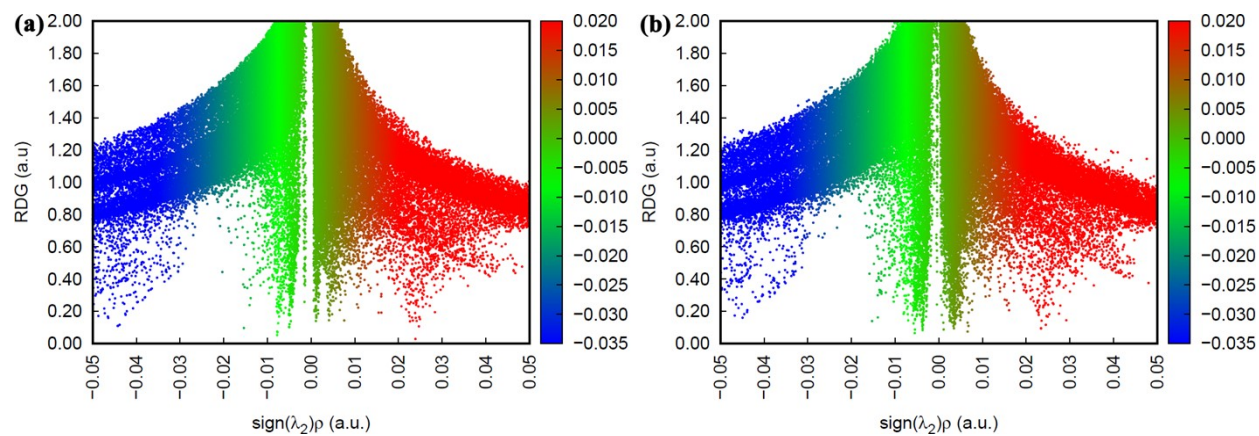

Fig. S4 The scatter graph of **1** (a) and **2** (b).

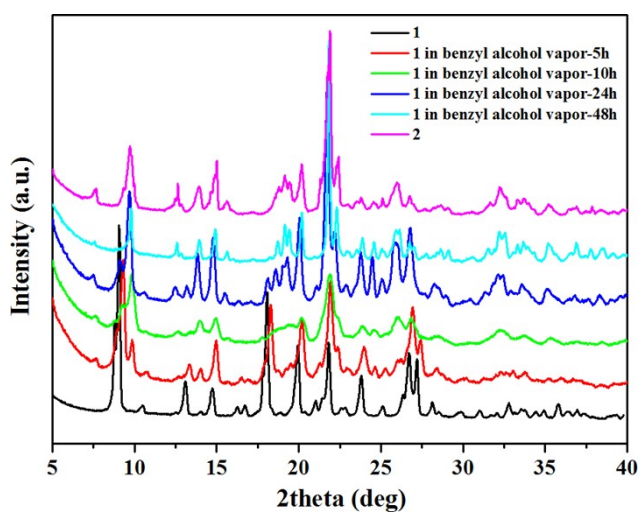

Fig. S5 Powder X-ray diffraction (PXRD) patterns of **1** transform into **2**.

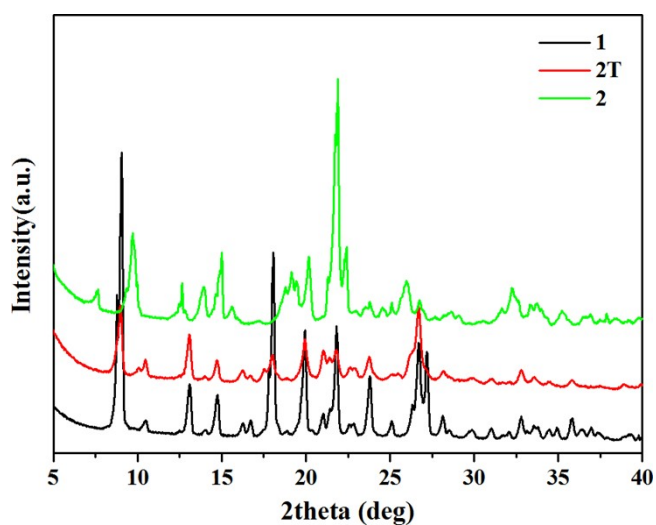

Fig. S6 Powder X-ray diffraction (PXRD) patterns of **2** transform into **1**.

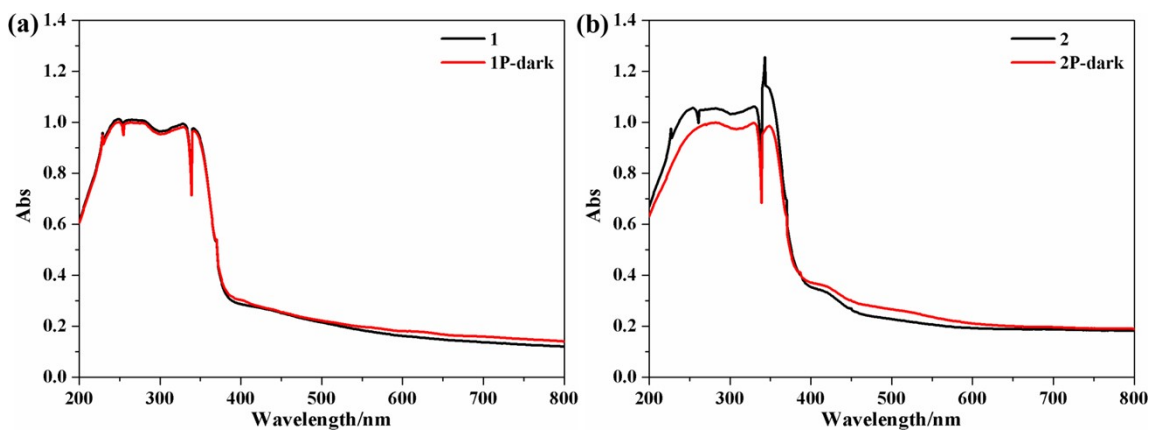

Fig. S7 The comparison UV-vis absorption spectra of **1** and **2** before and after light irradiation.

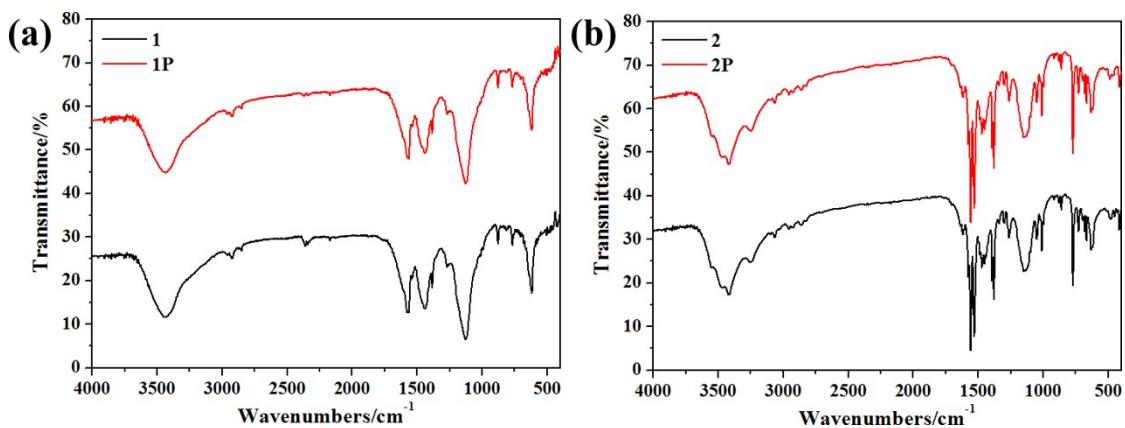

Fig. S8 IR spectra of **1**, **1P**, **2** and **2P**.

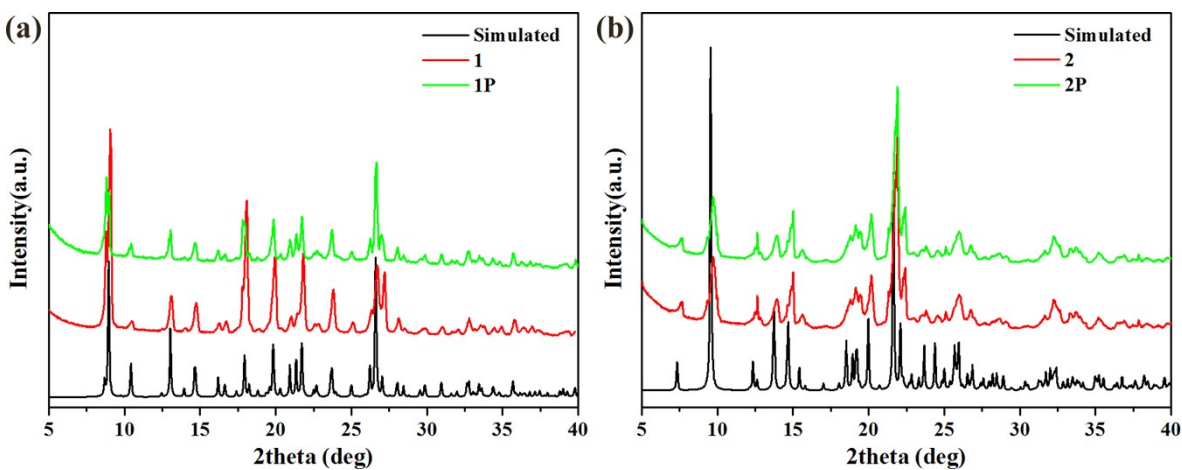

Fig. S9 Powder X-ray diffraction (PXRD) patterns of **1**, **1P**, **2** and **2P** at room temperature.

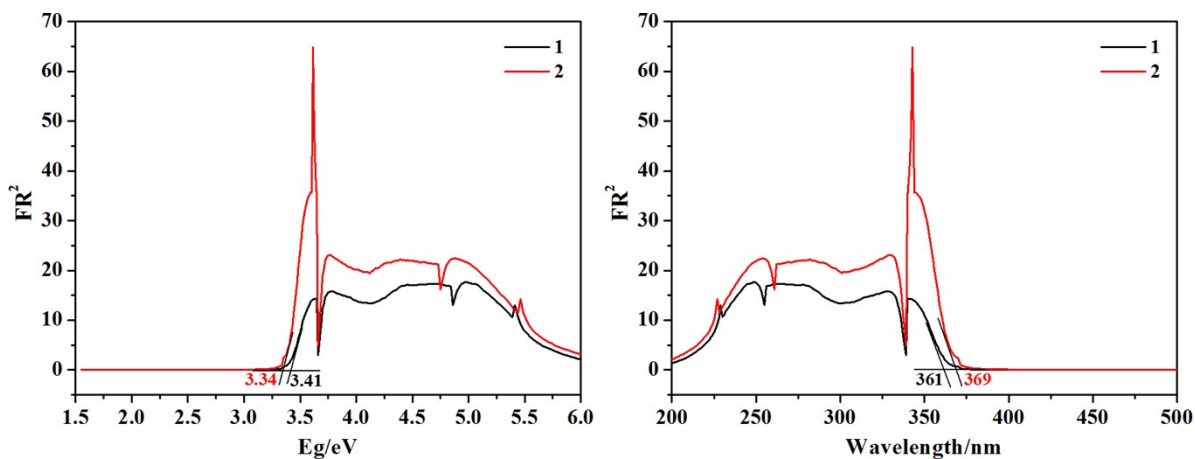

Fig. S10 The comparison of energy gaps and UV-vis absorption spectra of **1** and **2** before irradiation.

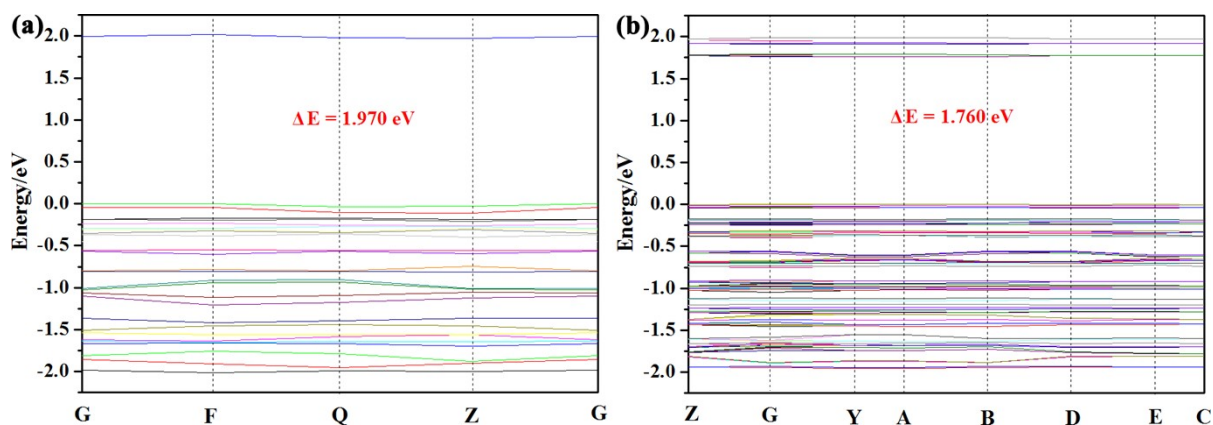

Fig. S11 Calculated band structures of **1** (a) and **2** (b).

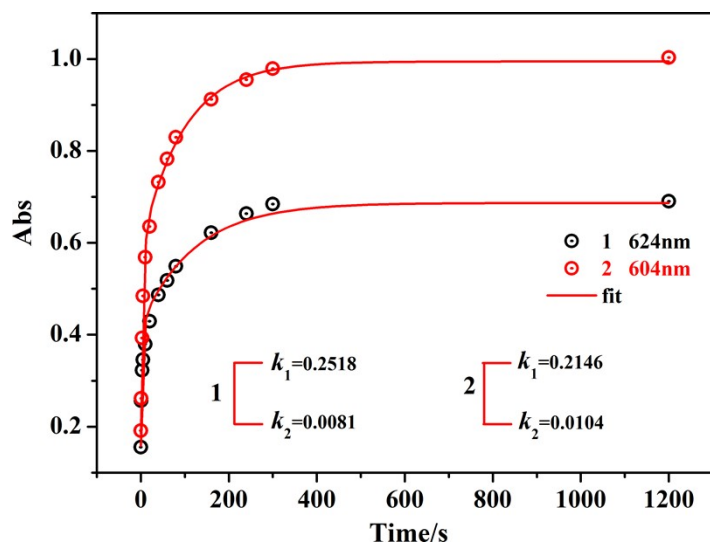

Fig. S12 Abs( $t$ ) vs.  $t$  plots for **1-2**. The lines show the fits of the plots according to rate law  $Abs(t) = A_0 + A_1(\exp(-k_1t) + \exp(-k_2t))$  (inset: coloration rate constant values of **1-2**). ( $\lambda_{max} = 484$  nm).

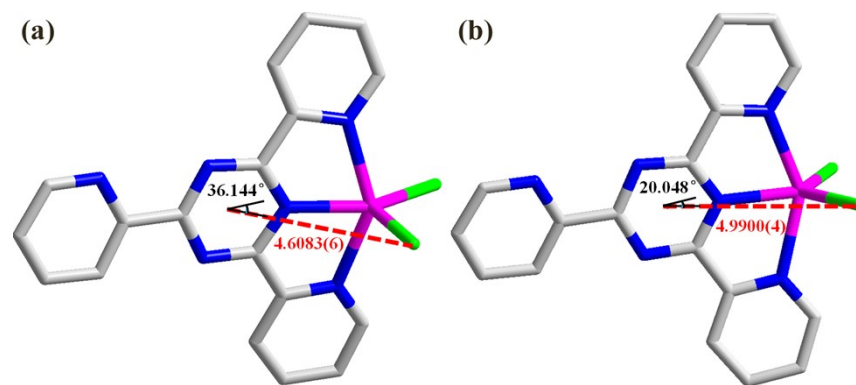

Fig. S13 View of the monomer diagrams of **1** (a) and **2** (b).

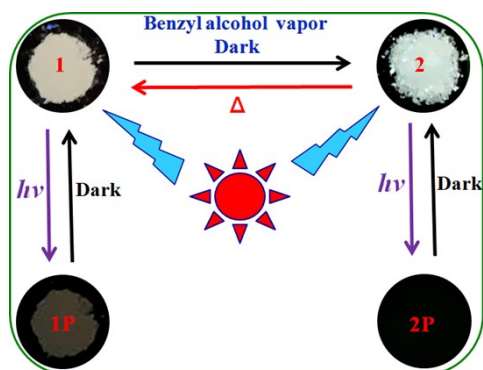

Fig. S14 Photographs showing the fluorescence of **1** and **2**.

## 2. Tables

**Table S1** Crystallographic data and refinement parameters of compounds **1** and **2**.

| Compounds                                                                                    | <b>1</b>                                                         | <b>2</b>                                                           |
|----------------------------------------------------------------------------------------------|------------------------------------------------------------------|--------------------------------------------------------------------|
| CCDC code                                                                                    | 1977000                                                          | 1977001                                                            |
| Temperature (K)                                                                              | 293(2)                                                           | 273(2)                                                             |
| Empirical formula                                                                            | C <sub>18</sub> H <sub>12</sub> N <sub>6</sub> ZnBr <sub>2</sub> | C <sub>25</sub> H <sub>20</sub> N <sub>6</sub> ZnBr <sub>2</sub> O |
| Formula weight                                                                               | 537.53                                                           | 645.66                                                             |
| Crystal size (mm)                                                                            | 0.20 x 0.15 x 0.06                                               | 0.30 x 0.08 x 0.07                                                 |
| Crystal system                                                                               | Triclinic                                                        | Monoclinic                                                         |
| Space group                                                                                  | <i>P</i> -1                                                      | <i>C</i> 2/ <i>c</i>                                               |
| <i>a</i> (Å)                                                                                 | 8.6016(10)                                                       | 24.165(3)                                                          |
| <i>b</i> (Å)                                                                                 | 10.7273(16)                                                      | 14.3269(19)                                                        |
| <i>c</i> (Å)                                                                                 | 11.1433(11)                                                      | 14.6252(19)                                                        |
| $\alpha$ (°)                                                                                 | 112.148(12)                                                      | 90                                                                 |
| $\beta$ (°)                                                                                  | 97.577(9)                                                        | 93.818(4)                                                          |
| $\gamma$ (°)                                                                                 | 92.538(10)                                                       | 90                                                                 |
| <i>V</i> (Å <sup>3</sup> )                                                                   | 939.1(2)                                                         | 5052.2(11)                                                         |
| <i>Z</i>                                                                                     | 2                                                                | 8                                                                  |
| <i>D</i> <sub>c</sub> (g cm <sup>-3</sup> )                                                  | 1.901                                                            | 1.698                                                              |
| <i>F</i> (000)                                                                               | 524                                                              | 2560                                                               |
| $\mu$ (mm <sup>-1</sup> )                                                                    | 1.901                                                            | 4.166                                                              |
| $\vartheta$ range (°)                                                                        | 4.34 to 71.26                                                    | 2.20 to 28.38                                                      |
| Reflections collected                                                                        | 6184                                                             | 37018                                                              |
| Unique reflections                                                                           | 3572                                                             | 6319                                                               |
| <i>R</i> <sub>int</sub>                                                                      | 0.0743                                                           | 0.1048                                                             |
| Goodness-of-fit on <i>F</i> <sup>2</sup>                                                     | 0.983                                                            | 1.075                                                              |
| <i>R</i> <sub>1</sub> / <i>wR</i> <sub>2</sub> , [ <i>I</i> ≥ 2σ( <i>I</i> )] <sup>a,b</sup> | 0.0650/0.1372                                                    | 0.0650/0.2765                                                      |
| <i>R</i> <sub>1</sub> / <i>wR</i> <sub>2</sub> , (all data)                                  | 0.1194/0.1820                                                    | 0.2021/0.3265                                                      |
| $\Delta\rho_{\max}/\Delta\rho_{\min}$ (e Å <sup>-3</sup> )                                   | 0.649/-0.819                                                     | 1.582/-0.929                                                       |



**Table S2** Selected bond lengths (Å) and angles (°) of **1** and **2**.

| Compound <b>1</b> |            |                   |            |
|-------------------|------------|-------------------|------------|
| Zn(1)-N(1)        | 2.258(7)   | Zn(1)-N(2)        | 2.067(7)   |
| Zn(1)-N(3)        | 2.305(7)   | Zn(1)-Br(1)       | 2.3777(15) |
| Zn(1)-Br(2)       | 2.3889(16) |                   |            |
| N(2)-Zn(1)-N(1)   | 72.8(3)    | N(2)-Zn(1)-N(3)   | 73.2(3)    |
| N(1)-Zn(1)-N(3)   | 142.2(3)   | N(2)-Zn(1)-Br(1)  | 140.22(19) |
| N(1)-Zn(1)-Br(1)  | 98.82(18)  | N(3)-Zn(1)-Br(1)  | 96.66(19)  |
| N(2)-Zn(1)-Br(2)  | 106.17(19) | N(1)-Zn(1)-Br(2)  | 103.78(19) |
| N(3)-Zn(1)-Br(2)  | 101.15(19) | Br(1)-Zn(1)-Br(2) | 113.56(6)  |
| Compound <b>2</b> |            |                   |            |
| Zn(1)-N(1)        | 2.281(9)   | Zn(1)-N(2)        | 2.095(8)   |
| Zn(1)-N(3)        | 2.277(10)  | Zn(1)-Br(1)       | 2.3552(19) |
| Zn(1)-Br(2)       | 2.3650(19) |                   |            |
| N(2)-Zn(1)-N(1)   | 73.1(3)    | N(2)-Zn(1)-N(3)   | 72.5(3)    |
| N(1)-Zn(1)-N(3)   | 145.6(3)   | N(2)-Zn(1)-Br(1)  | 122.0(2)   |
| N(1)-Zn(1)-Br(1)  | 100.8(2)   | N(3)-Zn(1)-Br(1)  | 97.9(2)    |
| N(2)-Zn(1)-Br(2)  | 116.9(2)   | N(1)-Zn(1)-Br(2)  | 95.7(3)    |
| N(3)-Zn(1)-Br(2)  | 99.0(2)    | Br(1)-Zn(1)-Br(2) | 121.09(8)  |

**Table S3** Anisotropic displacement parameters  $U_{ij}$  ( $\text{\AA}^2 \times 10^3$ ) for **1** and **2**.

| Compound 1 |          |           |         |         |         |         |
|------------|----------|-----------|---------|---------|---------|---------|
| Atom       | $U_{11}$ | U22       | U33     | U23     | U13     | U12     |
| Zn1        | 37.4(7)  | 62.2(8)   | 51.6(7) | 17.1(6) | 0.5(5)  | -1.4(6) |
| Br1        | 58.4(7)  | 87.7(9)   | 53.5(6) | 18.4(6) | -7.8(5) | -3.4(6) |
| Br2        | 45.3(6)  | 105.0(10) | 76.1(8) | 49.8(7) | 7.8(5)  | 8.3(6)  |
| C1         | 40(6)    | 87(8)     | 64(6)   | 25(6)   | -9(5)   | -5(5)   |
| C2         | 57(7)    | 78(8)     | 89(8)   | 27(7)   | 3(6)    | 23(6)   |
| C3         | 43(5)    | 60(7)     | 72(7)   | 11(5)   | 5(5)    | 16(5)   |
| C4         | 43(5)    | 50(6)     | 63(6)   | 8(5)    | 3(4)    | 7(4)    |
| C5         | 35(5)    | 53(6)     | 53(5)   | 14(4)   | 5(4)    | 12(4)   |
| C6         | 32(4)    | 46(5)     | 53(5)   | 16(4)   | -1(4)   | -2(4)   |
| C7         | 31(5)    | 62(7)     | 95(8)   | 28(6)   | 6(5)    | 1(4)    |
| C8         | 56(7)    | 74(9)     | 119(11) | 21(8)   | 14(7)   | 12(6)   |
| C9         | 80(8)    | 50(7)     | 88(8)   | 11(6)   | 20(7)   | 20(6)   |
| C10        | 53(6)    | 56(6)     | 60(6)   | 13(5)   | 2(5)    | -5(5)   |
| C11        | 29(4)    | 54(6)     | 44(5)   | 18(4)   | 2(3)    | 3(4)    |
| C12        | 43(5)    | 46(5)     | 46(5)   | 18(4)   | 1(4)    | -9(4)   |
| C13        | 26(4)    | 57(6)     | 52(5)   | 22(4)   | 0(3)    | 0(4)    |
| C14        | 60(7)    | 60(7)     | 78(7)   | 8(6)    | -9(5)   | 14(5)   |
| C15        | 58(6)    | 67(7)     | 59(6)   | 12(5)   | -10(5)  | -21(5)  |
| C16        | 37(5)    | 93(9)     | 67(7)   | 39(6)   | -13(5)  | -6(5)   |
| C17        | 48(6)    | 57(6)     | 61(6)   | 22(5)   | 1(4)    | 5(5)    |
| C18        | 35(5)    | 47(5)     | 53(5)   | 19(4)   | 0(4)    | -2(4)   |
| N1         | 34(4)    | 60(5)     | 54(4)   | 15(4)   | 6(3)    | 4(3)    |
| N2         | 35(4)    | 49(5)     | 50(4)   | 14(4)   | 8(3)    | 4(3)    |
| N3         | 38(4)    | 55(5)     | 58(5)   | 17(4)   | 5(3)    | 2(3)    |
| N4         | 51(5)    | 62(6)     | 61(5)   | 12(4)   | -4(4)   | 3(4)    |
| N5         | 37(4)    | 56(5)     | 50(4)   | 18(4)   | 3(3)    | 8(3)    |
| N6         | 36(4)    | 61(5)     | 55(5)   | 16(4)   | 4(3)    | 10(3)   |

| Compound 2 |          |           |          |          |          |         |
|------------|----------|-----------|----------|----------|----------|---------|
| Atom       | $U_{11}$ | U22       | U33      | U23      | U13      | U12     |
| Zn1        | 41.2(7)  | 57.1(9)   | 56.3(8)  | 1.0(6)   | 5.0(5)   | 6.3(6)  |
| Br1        | 62.0(9)  | 103.8(12) | 81.7(10) | 22.7(9)  | -11.4(7) | 5.8(8)  |
| Br2        | 77.6(10) | 71.5(9)   | 76.2(9)  | -14.9(7) | 32.5(7)  | -7.8(7) |
| C1         | 70(9)    | 61(9)     | 70(8)    | -2(7)    | 10(7)    | -4(7)   |
| C2         | 97(12)   | 53(8)     | 107(12)  | 19(8)    | 0(9)     | -22(8)  |
| C3         | 67(9)    | 75(10)    | 105(12)  | 25(9)    | -3(8)    | -20(8)  |
| C4         | 61(8)    | 74(9)     | 53(7)    | 10(6)    | -6(6)    | -14(7)  |
| C5         | 46(6)    | 64(8)     | 39(6)    | 0(5)     | -3(5)    | -14(6)  |
| C6         | 39(6)    | 60(7)     | 49(6)    | -4(5)    | -2(5)    | -9(5)   |
| C7         | 31(5)    | 69(8)     | 37(5)    | 0(5)     | -6(4)    | 7(5)    |
| C8         | 33(5)    | 45(6)     | 40(5)    | -2(5)    | 1(4)     | -1(5)   |
| C9         | 32(5)    | 54(7)     | 41(6)    | -7(5)    | -2(4)    | -6(5)   |
| C10        | 37(6)    | 56(7)     | 60(7)    | -16(6)   | -1(5)    | -6(5)   |
| C11        | 47(7)    | 57(8)     | 78(9)    | -10(6)   | 4(6)     | -10(6)  |
| C12        | 23(5)    | 70(8)     | 101(10)  | 1(7)     | 9(5)     | -6(6)   |
| C13        | 31(6)    | 61(8)     | 90(9)    | 0(7)     | 3(6)     | 2(5)    |
| C14        | 29(5)    | 74(8)     | 35(5)    | -7(5)    | -2(4)    | 9(5)    |
| C15        | 39(6)    | 86(9)     | 58(7)    | -12(6)   | 2(5)     | -6(6)   |
| C16        | 31(6)    | 132(15)   | 65(8)    | -6(9)    | 8(5)     | 19(8)   |
| C17        | 47(8)    | 117(14)   | 78(10)   | -13(9)   | -7(7)    | 36(9)   |
| C18        | 53(8)    | 91(10)    | 67(8)    | -23(7)   | -3(6)    | 23(7)   |
| C19        | 140(15)  | 91(11)    | 48(8)    | 11(8)    | -10(9)   | -19(11) |
| C20        | 135(17)  | 126(16)   | 95(14)   | 2(12)    | -37(12)  | -65(14) |
| C21        | 113(15)  | 160(20)   | 92(14)   | 39(13)   | -20(11)  | -66(14) |
| C22        | 92(11)   | 142(15)   | 61(9)    | -1(9)    | -17(8)   | -59(11) |
| C23        | 71(9)    | 85(10)    | 64(9)    | 2(7)     | 6(7)     | -16(8)  |
| C24        | 76(9)    | 48(7)     | 62(8)    | 2(6)     | -18(7)   | 7(6)    |
| C25        | 114(12)  | 54(8)     | 66(9)    | 4(7)     | 34(9)    | 12(8)   |
| N1         | 45(6)    | 56(6)     | 62(6)    | 7(5)     | 4(4)     | -3(5)   |
| N2         | 33(4)    | 50(5)     | 44(5)    | -3(4)    | -2(4)    | -1(4)   |

---

|    |       |         |       |        |       |        |
|----|-------|---------|-------|--------|-------|--------|
| N3 | 34(5) | 56(6)   | 63(6) | -3(5)  | 5(4)  | 5(4)   |
| N4 | 37(5) | 64(6)   | 43(5) | 1(4)   | 1(4)  | -4(4)  |
| N5 | 37(5) | 51(5)   | 44(5) | -11(4) | 0(4)  | -6(4)  |
| N6 | 45(5) | 76(8)   | 56(6) | -9(5)  | -2(4) | 19(5)  |
| O1 | 69(6) | 134(10) | 71(7) | 24(6)  | -5(5) | -11(6) |

---

**Table S4** Hydrogen bonds of compound **1** and **2** (Å and °).

| Compound <b>1</b>                                                 |        |          |           |        |
|-------------------------------------------------------------------|--------|----------|-----------|--------|
| D-H...A                                                           | d(D-H) | d(H...A) | d(D...A)  | <(DHA) |
| C(2)-H(2)...Br(1)#1                                               | 0.93   | 3.04     | 3.780(11) | 137.7  |
| C(7)-H(7)...Br(2)#2                                               | 0.93   | 2.94     | 3.762(9)  | 148.9  |
| C(14)-H(14)...Br(1)#3                                             | 0.93   | 3.14     | 3.995(11) | 154.1  |
| C(2)-H(2)...Br(1)#1                                               | 0.93   | 3.04     | 3.780(11) | 137.7  |
| C(7)-H(7)...Br(2)#2                                               | 0.93   | 2.94     | 3.762(9)  | 148.9  |
| C(14)-H(14)...Br(1)#3                                             | 0.93   | 3.14     | 3.995(11) | 154.1  |
| C(2)-H(2)...Br(1)#1                                               | 0.93   | 3.04     | 3.780(11) | 137.7  |
| C(7)-H(7)...Br(2)#2                                               | 0.93   | 2.94     | 3.762(9)  | 148.9  |
| C(14)-H(14)...Br(1)#3                                             | 0.93   | 3.14     | 3.995(11) | 154.1  |
| C(2)-H(2)...Br(1)#1                                               | 0.93   | 3.04     | 3.780(11) | 137.7  |
| Symmetry code: #1 -x+2,-y+1,-z+1; #2 x-1,y,z; #3 x-1,y-1,z-1      |        |          |           |        |
| Compound <b>2</b>                                                 |        |          |           |        |
| D-H...A                                                           | d(D-H) | d(H...A) | d(D...A)  | <(DHA) |
| C(4)-H(4)...Br(1)#1                                               | 0.93   | 3.09     | 3.906(14) | 146.8  |
| C(10)-H(10)...O(1)                                                | 0.93   | 2.52     | 3.441(16) | 172.1  |
| C(12)-H(12)...Br(2)#2                                             | 0.93   | 3.07     | 3.627(12) | 120.3  |
| C(13)-H(13)...Br(2)#2                                             | 0.93   | 2.88     | 3.546(11) | 130.0  |
| C(18)-H(18)...Br(2)#3                                             | 0.93   | 2.89     | 3.721(16) | 149.4  |
| Symmetry code: #1 -x,y,-z+1/2; #2 -x+1/2,-y+1/2,-z; #3 -x,-y+1,-z |        |          |           |        |

**Table S5** Selected QTAIM parameters [a.u.] and interaction energies  $E$  [kJ·mol<sup>-1</sup>] for compounds **1** and **2**.

| Compounds | Interactions  | $\rho_{CP}$ | $\nabla^2\rho$ | $V_{BCP}$ | $G_{BCP}$ | $H_{BCP}$ | $E$   |
|-----------|---------------|-------------|----------------|-----------|-----------|-----------|-------|
| <b>1</b>  | n- $\pi$      | 0.0078      | 0.0243         | -0.0039   | 0.0050    | 0.0011    | -5.10 |
|           | $\pi$ - $\pi$ | 0.0051      | 0.0128         | -0.0021   | 0.0026    | 0.0006    | -2.72 |
| <b>2</b>  | n- $\pi$      | 0.0082      | 0.0324         | -0.0051   | 0.0066    | 0.0015    | -6.70 |
|           | $\pi$ - $\pi$ | 0.0054      | 0.0150         | -0.0023   | 0.0030    | 0.0007    | -3.02 |
|           | $\pi$ - $\pi$ | 0.0059      | 0.0162         | -0.0025   | 0.0033    | 0.0008    | -3.28 |
|           | $\pi$ - $\pi$ | 0.0056      | 0.0176         | -0.0030   | 0.0037    | 0.0007    | -3.94 |

**Table S6** Reflectivity (R%) of the wavelengths (200-500nm) of compounds **1** and **2**.

| Wavelengths | Compound 1  | Compound 2  |
|-------------|-------------|-------------|
| 200         | 1.361197185 | 2.083747983 |
| 201         | 1.462336764 | 2.239696486 |
| 202         | 1.572079351 | 2.390496694 |
| 203         | 1.681291943 | 2.537626072 |
| 204         | 1.796874132 | 2.709152124 |
| 205         | 1.92883629  | 2.894520727 |
| 206         | 2.079305702 | 3.061744051 |
| 207         | 2.21771774  | 3.23294619  |
| 208         | 2.37719098  | 3.416938995 |
| 209         | 2.539381665 | 3.626682392 |
| 210         | 2.716588303 | 3.814951316 |
| 211         | 2.912262539 | 4.032643735 |
| 212         | 3.130518927 | 4.255628419 |
| 213         | 3.353877444 | 4.503785749 |
| 214         | 3.555555629 | 4.746376213 |
| 215         | 3.799980619 | 5.016266079 |
| 216         | 4.056317397 | 5.306279247 |
| 217         | 4.310948169 | 5.635624872 |
| 218         | 4.576563395 | 5.971813676 |
| 219         | 4.86883109  | 6.341312445 |
| 220         | 5.216772522 | 6.743390961 |
| 221         | 5.600494144 | 7.189881003 |
| 222         | 6.001547228 | 7.713687963 |
| 223         | 6.48353165  | 8.35610801  |
| 224         | 6.97833909  | 9.121696399 |
| 225         | 7.556732479 | 10.15083216 |
| 226         | 8.28629637  | 11.67032381 |
| 227         | 9.219651434 | 14.30256136 |
| 228         | 10.63200039 | 11.52230575 |
| 229         | 12.97017547 | 12.06189074 |

---

|     |             |             |
|-----|-------------|-------------|
| 230 | 10.59474498 | 12.69720972 |
| 231 | 11.12075509 | 13.26367253 |
| 232 | 11.70420402 | 13.87682567 |
| 233 | 12.25150329 | 14.47452367 |
| 234 | 12.77781022 | 14.96781962 |
| 235 | 13.22570954 | 15.54662248 |
| 236 | 13.65660908 | 16.12766827 |
| 237 | 14.14858674 | 16.67224819 |
| 238 | 14.58192118 | 17.19505533 |
| 239 | 15.05293682 | 17.71305953 |
| 240 | 15.46769949 | 18.25556108 |
| 241 | 15.83917322 | 18.69844288 |
| 242 | 16.23709012 | 19.22585427 |
| 243 | 16.68162205 | 19.62492802 |
| 244 | 17.07014191 | 20.06494318 |
| 245 | 17.23365881 | 20.50270723 |
| 246 | 17.35967074 | 20.87999327 |
| 247 | 17.44740513 | 21.17007487 |
| 248 | 17.58469117 | 21.41661705 |
| 249 | 17.62409774 | 21.70162877 |
| 250 | 17.53554687 | 21.85747081 |
| 251 | 17.30140656 | 22.06282656 |
| 252 | 16.7473746  | 22.19665356 |
| 253 | 15.97381105 | 22.35578122 |
| 254 | 14.74857113 | 22.42958033 |
| 255 | 13.0748456  | 22.39265263 |
| 256 | 16.77562702 | 22.233282   |
| 257 | 16.87011805 | 21.80940951 |
| 258 | 16.98415223 | 21.12341294 |
| 259 | 17.10848775 | 20.00944786 |
| 260 | 17.17578339 | 18.35768633 |
| 261 | 17.23365881 | 16.19141522 |

---



---

|     |             |             |
|-----|-------------|-------------|
| 262 | 17.2529904  | 21.27541277 |
| 263 | 17.27234191 | 21.33414296 |
| 264 | 17.34022934 | 21.36945298 |
| 265 | 17.33051615 | 21.32238494 |
| 266 | 17.30140656 | 21.40481702 |
| 267 | 17.23365881 | 21.4284231  |
| 268 | 17.18541688 | 21.54681498 |
| 269 | 17.18541688 | 21.71358003 |
| 270 | 17.15653129 | 21.71358003 |
| 271 | 17.19505533 | 21.63004887 |
| 272 | 17.13729902 | 21.6777445  |
| 273 | 17.07014191 | 21.79740947 |
| 274 | 17.08930495 | 21.86950144 |
| 275 | 17.02232063 | 21.89358107 |
| 276 | 17.07972096 | 22.0143476  |
| 277 | 17.09889388 | 22.0143476  |
| 278 | 17.15653129 | 22.02645809 |
| 279 | 17.10848775 | 21.97805308 |
| 280 | 16.95557752 | 22.03857474 |
| 281 | 16.88907479 | 22.13573025 |
| 282 | 16.7473746  | 22.17226564 |
| 283 | 16.56013838 | 22.12356418 |
| 284 | 16.34719243 | 22.0143476  |
| 285 | 16.07321127 | 21.97805308 |
| 286 | 15.91085007 | 21.82141566 |
| 287 | 15.66127362 | 21.71358003 |
| 288 | 15.41528818 | 21.64196367 |
| 289 | 15.11278211 | 21.64196367 |
| 290 | 14.8409691  | 21.55868737 |
| 291 | 14.54879847 | 21.41661705 |
| 292 | 14.37602961 | 21.38123498 |
| 293 | 14.22943625 | 21.08847889 |

---

---

|     |             |             |
|-----|-------------|-------------|
| 294 | 14.09224194 | 20.83392252 |
| 295 | 13.94829476 | 20.604974   |
| 296 | 13.76631559 | 20.45740595 |
| 297 | 13.63320456 | 20.42349067 |
| 298 | 13.53220713 | 20.15403121 |
| 299 | 13.41651978 | 19.88785632 |
| 300 | 13.34754093 | 19.63581904 |
| 301 | 13.37815818 | 19.51632382 |
| 302 | 13.41651978 | 19.6576178  |
| 303 | 13.49354401 | 19.69035779 |
| 304 | 13.51672978 | 19.6576178  |
| 305 | 13.48582348 | 19.7559887  |
| 306 | 13.52446644 | 19.81083521 |
| 307 | 13.60205545 | 19.89888186 |
| 308 | 13.69569808 | 20.04272803 |
| 309 | 13.78205342 | 20.13172505 |
| 310 | 13.90854834 | 20.198712   |
| 311 | 14.02809881 | 20.25469155 |
| 312 | 14.164723   | 20.37835104 |
| 313 | 14.36784948 | 20.49137323 |
| 314 | 14.54052855 | 20.55946409 |
| 315 | 14.65669944 | 20.7077117  |
| 316 | 14.65669944 | 20.87999327 |
| 317 | 14.78210935 | 21.07684608 |
| 318 | 14.88314293 | 21.20513382 |
| 319 | 14.95084911 | 21.35767697 |
| 320 | 15.03587804 | 21.57056581 |
| 321 | 15.14707709 | 21.70162877 |
| 322 | 15.25038983 | 21.9901451  |
| 323 | 15.35434719 | 22.11140429 |
| 324 | 15.45895295 | 22.28220693 |
| 325 | 15.55541443 | 22.36806544 |

---

---

|     |             |             |
|-----|-------------|-------------|
| 326 | 15.67898084 | 22.5902528  |
| 327 | 15.81237078 | 22.75199045 |
| 328 | 15.76779238 | 22.91479999 |
| 329 | 15.77669884 | 23.05340413 |
| 330 | 15.65242689 | 23.09133983 |
| 331 | 15.52027393 | 22.95252436 |
| 332 | 15.13849668 | 22.66476818 |
| 333 | 14.5570727  | 21.84544631 |
| 334 | 13.58650524 | 20.59358781 |
| 335 | 12.15285016 | 18.77146919 |
| 336 | 10.21662838 | 16.10949717 |
| 337 | 7.854595165 | 12.6170722  |
| 338 | 5.316307717 | 8.687203256 |
| 339 | 2.938055667 | 4.906106167 |
| 340 | 14.3433346  | 34.81362992 |
| 341 | 14.31070753 | 39.54319843 |
| 342 | 14.29441943 | 47.70799111 |
| 343 | 14.15665277 | 64.88697389 |
| 344 | 13.90854834 | 35.67686968 |
| 345 | 13.62541119 | 35.6578922  |
| 346 | 13.25607199 | 35.26154373 |
| 347 | 12.79987286 | 34.9065034  |
| 348 | 12.25857772 | 34.29780095 |
| 349 | 11.62978507 | 33.18096275 |
| 350 | 10.97907549 | 32.01235806 |
| 351 | 10.23463957 | 30.48666525 |
| 352 | 9.463098781 | 28.71755467 |
| 353 | 8.630356399 | 26.81097327 |
| 354 | 7.779160414 | 24.57652586 |
| 355 | 6.910477407 | 22.25773202 |
| 356 | 6.080224033 | 20.06494318 |
| 357 | 5.272971648 | 17.81239011 |

---

---

|     |             |             |
|-----|-------------|-------------|
| 358 | 4.53277381  | 15.50273096 |
| 359 | 3.837503963 | 13.33225627 |
| 360 | 3.204922356 | 11.2379049  |
| 361 | 2.664902748 | 9.491126635 |
| 362 | 2.211472145 | 7.930684592 |
| 363 | 1.819198021 | 6.620449141 |
| 364 | 1.500041234 | 5.475623318 |
| 365 | 1.24670545  | 4.553162898 |
| 366 | 1.038511474 | 3.832482223 |
| 367 | 0.885812393 | 3.272099599 |
| 368 | 0.781021937 | 2.85931735  |
| 369 | 0.731683366 | 2.583612699 |
| 370 | 0.750345676 | 2.499266423 |
| 371 | 0.449704078 | 1.149340829 |
| 372 | 0.280829916 | 0.9642706   |
| 373 | 0.237946008 | 0.816764617 |
| 374 | 0.20459748  | 0.700836488 |
| 375 | 0.176832356 | 0.605107655 |
| 376 | 0.154939313 | 0.528808399 |
| 377 | 0.1366765   | 0.467763018 |
| 378 | 0.121457239 | 0.417224742 |
| 379 | 0.109733173 | 0.37583028  |
| 380 | 0.100034151 | 0.341113123 |
| 381 | 0.092067217 | 0.31117194  |
| 382 | 0.08603671  | 0.287102019 |
| 383 | 0.080635049 | 0.265629396 |
| 384 | 0.075902992 | 0.248522521 |
| 385 | 0.072256438 | 0.233768727 |
| 386 | 0.069027358 | 0.221119798 |
| 387 | 0.06627256  | 0.210365193 |
| 388 | 0.064749969 | 0.200678743 |
| 389 | 0.062646928 | 0.193859697 |

---

---

|     |             |             |
|-----|-------------|-------------|
| 390 | 0.061020023 | 0.171619261 |
| 391 | 0.059842421 | 0.163936793 |
| 392 | 0.057459313 | 0.157240089 |
| 393 | 0.05641527  | 0.151106426 |
| 394 | 0.055543409 | 0.146000991 |
| 395 | 0.05475992  | 0.140869549 |
| 396 | 0.053754238 | 0.136995501 |
| 397 | 0.05314252  | 0.13320601  |
| 398 | 0.052460807 | 0.130111676 |
| 399 | 0.051860553 | 0.12677364  |
| 400 | 0.051265639 | 0.124536663 |
| 401 | 0.050676031 | 0.122330887 |
| 402 | 0.05001902  | 0.120155983 |
| 403 | 0.049729144 | 0.118438067 |
| 404 | 0.049296773 | 0.117444911 |
| 405 | 0.048724817 | 0.115757607 |
| 406 | 0.048369964 | 0.114643371 |
| 407 | 0.047876538 | 0.112987844 |
| 408 | 0.047247872 | 0.111758576 |
| 409 | 0.046832327 | 0.110539843 |
| 410 | 0.046488207 | 0.109064486 |
| 411 | 0.046009731 | 0.108399004 |
| 412 | 0.045738033 | 0.107209176 |
| 413 | 0.045265553 | 0.105899197 |
| 414 | 0.04466364  | 0.104601815 |
| 415 | 0.044597145 | 0.103189138 |
| 416 | 0.044265818 | 0.101665153 |
| 417 | 0.043805165 | 0.100034151 |
| 418 | 0.043348229 | 0.097932338 |
| 419 | 0.043088784 | 0.096590898 |
| 420 | 0.04289499  | 0.09502417  |
| 421 | 0.042509423 | 0.092887795 |

---

---

|     |             |             |
|-----|-------------|-------------|
| 422 | 0.04219017  | 0.090673726 |
| 423 | 0.041746335 | 0.088501181 |
| 424 | 0.04149434  | 0.086147553 |
| 425 | 0.041056181 | 0.083734641 |
| 426 | 0.040436454 | 0.081268865 |
| 427 | 0.040129314 | 0.078963732 |
| 428 | 0.03976313  | 0.076811313 |
| 429 | 0.039278907 | 0.074012949 |
| 430 | 0.038739614 | 0.071678217 |
| 431 | 0.03826506  | 0.069401299 |
| 432 | 0.037912101 | 0.066816546 |
| 433 | 0.037561662 | 0.064484128 |
| 434 | 0.037213728 | 0.062387831 |
| 435 | 0.036925689 | 0.06017706  |
| 436 | 0.036696499 | 0.05794621  |
| 437 | 0.036354775 | 0.05609701  |
| 438 | 0.036015511 | 0.053985036 |
| 439 | 0.035511203 | 0.051935292 |
| 440 | 0.035067519 | 0.050091694 |
| 441 | 0.034573499 | 0.048653685 |
| 442 | 0.034138892 | 0.047109041 |
| 443 | 0.033708511 | 0.045670304 |
| 444 | 0.033335369 | 0.044398119 |
| 445 | 0.032703115 | 0.04289499  |
| 446 | 0.032183331 | 0.041936106 |
| 447 | 0.031772107 | 0.040807416 |
| 448 | 0.031213298 | 0.040129314 |
| 449 | 0.030562682 | 0.039945898 |
| 450 | 0.029873751 | 0.040374881 |
| 451 | 0.029776317 | 0.036015511 |
| 452 | 0.029389025 | 0.034957269 |
| 453 | 0.029148944 | 0.034084864 |

---

---

|     |             |             |
|-----|-------------|-------------|
| 454 | 0.028673312 | 0.033335369 |
| 455 | 0.028203675 | 0.032494431 |
| 456 | 0.027832245 | 0.031823288 |
| 457 | 0.027464589 | 0.031466356 |
| 458 | 0.027191308 | 0.031011984 |
| 459 | 0.026920122 | 0.030711889 |
| 460 | 0.026517249 | 0.029101109 |
| 461 | 0.026251254 | 0.028626079 |
| 462 | 0.026207122 | 0.028297125 |
| 463 | 0.025207718 | 0.027832245 |
| 464 | 0.024951888 | 0.027327686 |
| 465 | 0.02457189  | 0.027055454 |
| 466 | 0.024154901 | 0.026695728 |
| 467 | 0.023702513 | 0.02633969  |
| 468 | 0.023458514 | 0.026119028 |
| 469 | 0.023216448 | 0.025768927 |
| 470 | 0.022738072 | 0.025465558 |
| 471 | 0.022462536 | 0.025207718 |
| 472 | 0.022150783 | 0.024951888 |
| 473 | 0.021842361 | 0.024782447 |
| 474 | 0.021613214 | 0.024488053 |
| 475 | 0.021348213 | 0.024321039 |
| 476 | 0.021048414 | 0.024113503 |
| 477 | 0.020788747 | 0.02382524  |
| 478 | 0.020458508 | 0.023620964 |
| 479 | 0.020204448 | 0.023418036 |
| 480 | 0.019988614 | 0.023216448 |
| 481 | 0.019774551 | 0.023096137 |
| 482 | 0.019527037 | 0.022976305 |
| 483 | 0.019212301 | 0.022698552 |
| 484 | 0.019004647 | 0.022540998 |
| 485 | 0.018764561 | 0.022540998 |

---

---

|     |             |             |
|-----|-------------|-------------|
| 486 | 0.018526806 | 0.022228408 |
| 487 | 0.018358399 | 0.021919155 |
| 488 | 0.018091388 | 0.021804041 |
| 489 | 0.01789309  | 0.021575203 |
| 490 | 0.017566296 | 0.021499335 |
| 491 | 0.017469155 | 0.021385917 |
| 492 | 0.017372425 | 0.021160457 |
| 493 | 0.017180196 | 0.020936825 |
| 494 | 0.016957991 | 0.020825691 |
| 495 | 0.016675539 | 0.020641474 |
| 496 | 0.016427505 | 0.020385671 |
| 497 | 0.016182303 | 0.020385671 |
| 498 | 0.016091078 | 0.020276789 |
| 499 | 0.015909809 | 0.020060361 |
| 500 | 0.015640838 | 0.019917063 |

---



**Table S7** Photochromic kinetic parameters at room temperature of compounds **1** and **2**.

| Compounds | $A_0$   | $A_1$    | $k_1$ (s <sup>-1</sup> ) | $k_2$ (s <sup>-1</sup> ) | $R$     |
|-----------|---------|----------|--------------------------|--------------------------|---------|
| <b>1</b>  | 0.6868  | -0.2645  | 0.25178                  | 0.00813                  | 0.97961 |
| <b>2</b>  | 0.99467 | -0.40487 | 0.21455                  | 0.01037                  | 0.99797 |
